# Supplementary material for: Pravastatin Improves Glucose Regulation and Biocompatibility of Agarose Encapsulated Porcine Islets following Transplantation into Pancreatectomized Dogs
Source: J Diabetes Res. 2014 May 19;2014:405362. doi: 10.1155/2014/405362 (PMC4055154; doi:10.1155/2014/405362)
Supplement: Supplementary file 1 — Complete blood biochemical profiles (BBP, including fructosamine and glycosylated hemoglobin) and complete blood counts (CBC) were performed on all study animals prior to induction, three weeks post-induction, and every month thereafter. The tabulated results of this testing is provided for each study animal as Supplementary Figure S1 (BBP) and Figure S2 (CBC). Supplementary Figure S1: Biochemical indices of individual study animals. UYL-0, TSL-0, and ORL-0 did not receive pravastatin. VPL-0, UDL-0 and UVL-0 received pravastatin treatment. Indices were assessed pre/post-induction, 19-, 53-, and 82-days post-macrobead implant #1, and 11-, 41-, and 187-days post-macrobead implant #2. ORL-0 and UVL-0 did not receive a second macrobead implant. Supplementary Figure S2: Complete blood count profiles of individual study animals. UYL-0, TSL-0, and ORL-0 did not receive pravastatin. VPL-0, UDL-0 and UVL-0 received pravastatin treatment. CBC profiles were assessed pre/post-induction, 19-, 53-, and 82-days post-macrobead implant #1, and 11-, 41-, and 187-days post-macrobead implant #2. ORL-0 and UVL-0 did not receive a second macrobead implant. [file 405362.f1.xlsx]

## Sheet: Figure S2 (L Gazda 405362)
	Animal ID	Parameter	Reference Range	Pre-Induction	21 days Post-Induction	17 days Pre-Implant #1	19 days Post-Implant #1	53 days Post-Implant #1	82 days Post-Implant #1	11 days Post-Implant #2	41 days Post-Implant #2	187 days Post-Implant #2
NON-PRAVASTATIN TREATED GROUP	UYL-0	HGB (g/dL)	12.1 - 20.3	15.7	15.3	15.8	14.5	14.7	15.6	15.1	15.1	13.4
		PCV (%)	36 - 60	46	48.6	50.6	45.7	45.4	47.5	45.1	46	41.7
		WBC (x 103/µl)	4.0 - 15.5	15.7	13.9	9.7	17.5	16.9	14.3	20.4	23.7	13.1
		RBC (x 106/µl)	4.8 - 9.3	7	6.58	6.81	6.31	6.08	6.54	6.17	6.26	5.67
		MCV	58 - 79	66	74	74	72	75	73	73	73	74
		MCH	19 - 28	22.4	23.3	23.2	23	24.2	23.9	24.5	24.1	23.6
		MCHC	30 - 38	34	31.5	31.2	31.7	32.4	32.8	33.5	32.8	32.1
		Platelet Estimate	Adequate	ad	ad	ad	ad	ad	ad	ad	ad	ad
		Neutrophils (%)	60 - 77	71	73	66	74	69	67	79	64	68
		Absolute (per µl)	2060 - 10600	11147	10147	6402	12950	11661	9581	16116	15168	8908
		Bands (%)	0 - 3	1	0	0	0	0	0	0	2	0
		Absolute (per µl)	0 - 300	157	0	0	0	0	0	0	474	0
		Lymphocytes (%)	12 - 30	17	16	30	15	15	18	10	22	18
		Absolute (per µl)	690 - 4500	2669	2224	2910	2625	2535	2574	2040	5214	2358
		Monocytes (%)	3 - 10	10	10	4	9	15	11	10	12	10
		Absolute (per µl)	0 - 840	1570	1390	388	1575	2535	1573	2040	2844	1310
		Eosinophils (%)	2 - 10	1	0	0	2	1	4	0	0	4
		Absolute (per µl)	0 - 1200	157	0	0	350	169	572	0	0	524
		Basophils (%)	0 - 1	NR	1	0	0	0	0	1	0	0
		Absolute (per µl)	0 - 150	NR	139	0	0	0	0	204	0	0
		Platelets (x 103/µl)	170 - 400	293	289	300	350	247	434	333	200	183
	TSL-0	HGB (g/dL)	12.1 - 20.3	13.1	12	14.7	13.5	13.3	14.1	15.4	13.8	13.1
		PCV (%)	36 - 60	39	37.6	46.5	42.3	41.9	42.1	46.5	41.9	42.4
		WBC (x 103/µl)	4.0 - 15.5	8	9.7	17.5	14.1	17.6	21	16.2	19.9	14.6
		RBC (x 106/µl)	4.8 - 9.3	5.6	4.94	6.07	5.61	5.49	5.65	6.34	5.52	5.43
		MCV	58 - 79	69	76	77	75	76	75	73	76	78
		MCH	19 - 28	23.3	24.3	24.2	24.1	24.2	25	24.3	25	24.1
		MCHC	30 - 38	34	31.9	31.6	31.9	31.7	33.5	33.1	32.9	30.9
		Platelet Estimate	Adequate	ad	ad	ad	ad	ad	ad	ad	ad	ad
		Neutrophils (%)	60 - 77	64	73	79	65	76	81	71	68	81
		Absolute (per µl)	2060 - 10600	5120	7081	13825	9165	13376	17010	11502	13532	11826
		Bands (%)	0 - 3	NR	0	0	0	0	0	10	2	0
		Absolute (per µl)	0 - 300	NR	0	0	0	0	0	1620	398	0
		Lymphocytes (%)	12 - 30	25	17	14	26	12	11	13	18	9
		Absolute (per µl)	690 - 4500	2000	1649	2450	3666	2112	2310	2106	3582	1314
		Monocytes (%)	3 - 10	10	10	6	9	11	8	6	11	9
		Absolute (per µl)	0 - 840	800	970	1050	1269	1936	1680	972	2189	1314
		Eosinophils (%)	2 - 10	1	0	0	0	0	0	0	1	0
		Absolute (per µl)	0 - 1200	80	0	0	0	0	0	0	199	0
		Basophils (%)	0 - 1	NR	0	1	0	1	0	0	0	1
		Absolute (per µl)	0 - 150	NR	0	175	0	176	0	0	0	146
		Platelets (x 103/µl)	170 - 400	248	447	217	200	200	344	210	260	245
	ORL-0*	HGB (g/dL)	12.1 - 20.3	13.6	12.9	13.5	13.9	12.7	13.7	13.2	12	12.7
		PCV (%)	36 - 60	40	42.3	43.6	45.4	39.8	41.3	39.8	36.4	39.8
		WBC (x 103/µl)	4.0 - 15.5	9.4	12.4	10	16	15.7	12.8	13.4	14.7	12.6
		RBC (x 106/µl)	4.8 - 9.3	6	5.85	6.03	6.28	5.46	5.8	5.62	5.11	5.45
		MCV	58 - 79	66	72	72	72	73	71	71	71	73
		MCH	19 - 28	22.6	22.1	22.4	22.1	23.3	23.6	23.5	23.5	23.3
		MCHC	30 - 38	34	30.5	31	30.6	31.9	33.2	33.2	33	31.9
		Platelet Estimate	Adequate	ad	ad	ad	ad	ad	ad	ad	ad	ad
		Neutrophils (%)	60 - 77	64	69	61	64	77	64	66	47	63
		Absolute (per µl)	2060 - 10600	6016	8556	6100	10240	12089	8192	8844	6909	7938
		Bands (%)	0 - 3	NR	0	0	4	0	2	6	20	0
		Absolute (per µl)	0 - 300	NR	0	0	640	0	256	804	2940	0
		Lymphocytes (%)	12 - 30	26	20	30	19	13	19	17	16	19
		Absolute (per µl)	690 - 4500	2444	2480	3000	3040	2041	2432	2278	2352	2394
		Monocytes (%)	3 - 10	10	10	8	10	9	12	9	16	11
		Absolute (per µl)	0 - 840	940	1240	800	1600	1413	1536	1206	2352	1386
		Eosinophils (%)	2 - 10	NR	0	0	3	1	3	2	1	7
		Absolute (per µl)	0 - 1200	NR	0	0	480	157	384	268	147	882
		Basophils (%)	0 - 1	NR	1	1	0	0	0	0	0	0
		Absolute (per µl)	0 - 150	NR	124	100	0	0	0	0	0	0
		Platelets (x 103/µl)	170 - 400	305	234	205	177	223	452	463	418	342
	*ORL-0 did not receive a second macrobead implant.
	Animal ID	Parameter	Reference Range	Pre-Induction	21 days Post-Induction	17 days Pre-Implant #1	19 days Post-Implant #1	53 days Post-Implant #1	82 days Post-Implant #1	11 days Post-Implant #2	41 days Post-Implant #2	187 days Post-Implant #2
PRAVASTATIN TREATED GROUP	VPL-0	HGB (g/dL)	12.1 - 20.3	15.9	14.5	15.2	15.3	14.6	16.2	16.1	15.3	14.3
		PCV (%)	36 - 60	51	46.5	48.9	49.7	44.5	48.3	48.6	46.6	46.3
		WBC (x 103/µl)	4.0 - 15.5	6.3	8.7	8.3	12.7	9.9	8.7	12	14.8	9.4
		RBC (x 106/µl)	4.8 - 9.3	7.5	6.28	6.53	6.46	6.04	6.68	6.7	6.32	5.94
		MCV	58 - 79	68	74	75	77	74	72	73	74	78
		MCH	19 - 28	21.4	23.1	23.3	23.7	24.2	24.3	24	24.2	24.1
		MCHC	30 - 38	31	31.2	31.1	30.8	32.8	33.5	33.1	32.8	30.9
		Platelet Estimate	Adequate	ad	ad	ad	ad	ad	ad	ad	ad	ad
		Neutrophils (%)	60 - 77	70	68	62	72	65	69	75	72	70
		Absolute (per µl)	2060 - 10600	4410	5916	5146	9144	6435	6003	9000	10656	6580
		Bands (%)	0 - 3	NR	0	0	0	0	0	2	0	0
		Absolute (per µl)	0 - 300	NR	0	0	0	0	0	240	0	0
		Lymphocytes (%)	12 - 30	20	21	30	16	23	20	17	14	17
		Absolute (per µl)	690 - 4500	1260	1827	2490	2032	2277	1740	2040	2072	1598
		Monocytes (%)	3 - 10	10	11	7	11	10	10	5	12	12
		Absolute (per µl)	0 - 840	630	957	581	1397	990	870	600	1776	1128
		Eosinophils (%)	2 - 10	NR	0	0	0	1	0	1	2	0
		Absolute (per µl)	0 - 1200	NR	0	0	0	99	0	120	296	0
		Basophils (%)	0 - 1	NR	0	1	1	1	1	0	0	1
		Absolute (per µl)	0 - 150	NR	0	83	127	99	87	0	0	94
		Platelets (x 103/µl)	170 - 400	287	244	250	290	400	220	400	210	120
	UDL-0	HGB (g/dL)	12.1 - 20.3	12.8	12.6	12.9	13.6	13.2	13	14.3	13.6	12.3
		PCV (%)	36 - 60	38	40.5	40.7	44.7	40.4	39.5	43.5	41.3	39
		WBC (x 103/µl)	4.0 - 15.5	8.3	13.4	16.2	16.3	9.9	12	16.6	10.8	12.1
		RBC (x 106/µl)	4.8 - 9.3	5.8	5.73	5.74	6.28	5.71	5.72	6.28	6	5.34
		MCV	58 - 79	65	71	71	71	71	69	69	69	73
		MCH	19 - 28	22	22	22.5	21.7	23.1	22.7	22.8	22.7	23
		MCHC	30 - 38	34	31.1	31.7	30.4	32.7	32.9	32.9	32.9	31.5
		Platelet Estimate	Adequate	ad	incr	ad	ad	ad	ad	ad	ad	ad
		Neutrophils (%)	60 - 77	60	75	73	63	62	71	74	64	74
		Absolute (per µl)	2060 - 10600	4980	10050	11826	10269	6138	8520	12284	6912	8954
		Bands (%)	0 - 3	NR	0	0	0	0	0	0	1	0
		Absolute (per µl)	0 - 300	NR	0	0	0	0	0	0	108	0
		Lymphocytes (%)	12 - 30	28	15	18	25	24	16	11	26	15
		Absolute (per µl)	690 - 4500	2324	2010	2916	4075	2376	1920	1826	2808	1815
		Monocytes (%)	3 - 10	10	8	7	7	7	7	12	9	10
		Absolute (per µl)	0 - 840	830	1072	1134	1141	693	840	1992	972	1210
		Eosinophils (%)	2 - 10	2	2	1	5	7	6	2	0	0
		Absolute (per µl)	0 - 1200	166	268	162	815	693	720	332	0	0
		Basophils (%)	0 - 1	NR	0	1	0	0	0	1	0	1
		Absolute (per µl)	0 - 150	NR	0	162	0	0	0	166	0	121
		Platelets (x 103/µl)	170 - 400	357	508	180	220	284	469	446	393	389
	UVL-0**	HGB (g/dL)	12.1 - 20.3	12.9	12.6	13.7	15.3	13.7	16	14.3	14.7	15.1
		PCV (%)	36 - 60	38	39.5	43.1	49.1	42.4	48.7	42.9	44.3	48
		WBC (x 103/µl)	4.0 - 15.5	10.4	14.3	10	14.3	16.6	13.1	13.8	11.5	11.5
		RBC (x 106/µl)	4.8 - 9.3	5.6	5.29	5.91	6.63	5.73	6.78	5.97	6.21	6.44
		MCV	58 - 79	68	75	73	74	74	72	72	71	75
		MCH	19 - 28	23.1	23.8	23.2	23.1	23.9	23.6	24	23.7	23.4
		MCHC	30 - 38	34	31.9	31.8	31.2	32.3	32.9	33.3	33.2	31.5
		Platelet Estimate	Adequate	ad	ad	ad	ad	ad	ad	ad	ad	ad
		Neutrophils (%)	60 - 77	66	75	71	76	75	70	73	67	71
		Absolute (per µl)	2060 - 10600	6864	10725	7100	10868	12450	9170	10074	7705	8165
		Bands (%)	0 - 3	NR	0	0	0	0	0	0	0	0
		Absolute (per µl)	0 - 300	NR	0	0	0	0	0	0	0	0
		Lymphocytes (%)	12 - 30	23	14	25	14	14	18	15	21	22
		Absolute (per µl)	690 - 4500	2392	2002	2500	2002	2324	2358	2070	2415	2530
		Monocytes (%)	3 - 10	10	10	4	8	9	10	9	8	6
		Absolute (per µl)	0 - 840	1040	1430	400	1144	1494	1310	1242	920	690
		Eosinophils (%)	2 - 10	1	0	0	1	1	2	2	3	0
		Absolute (per µl)	0 - 1200	104	0	0	143	166	262	276	345	0
		Basophils (%)	0 - 1	NR	1	0	1	1	0	1	1	1
		Absolute (per µl)	0 - 150	NR	143	0	143	166	0	138	115	115
		Platelets (x 103/µl)	170 - 400	268	342	242	293	282	403	431	379	298
	**UVL-0 did not receive a second macrobead implant.
